# Supplementary material for: Organic Fertilizer with High Nutrient Levels Affected Peanut-Growing Soil Bacteria More Than Fungi at Low Doses
Source: MDPI journal article supplement (doi:10.3390/agronomy14040765), 2024-04-08
Supplement: s1 [file s1]

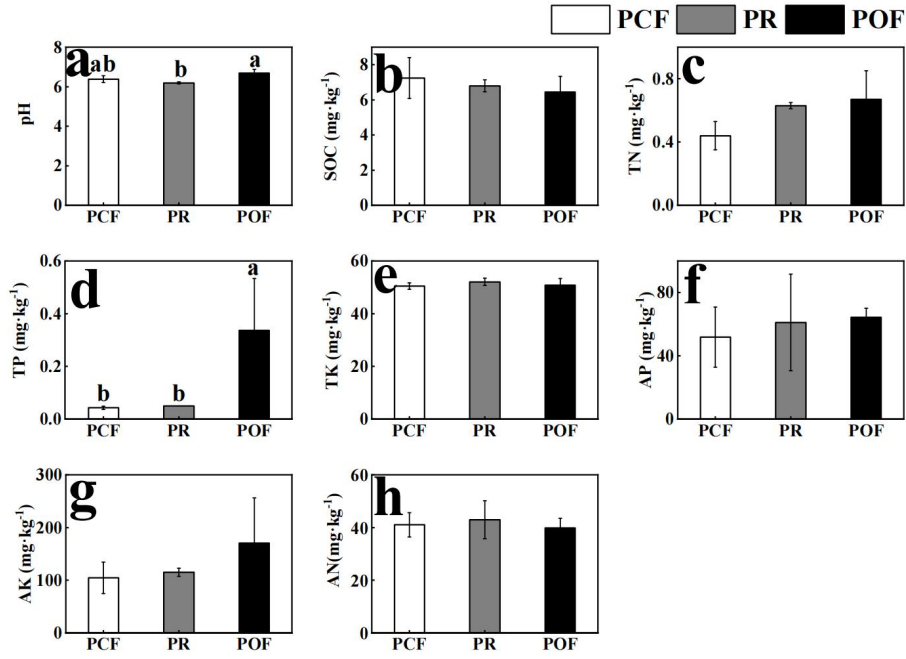

**Figure S1. Effects of low dosage organic fertilizer produced by high temperature aerobic fermentation on soil physico-chemical properties.** Note: PCF: Chemical fertilizer application; POF: Organic fertilizer application; PR: Organic fertilizer replaces 50% chemical fertilizer. SOC: soil organic carbon content; TN: Total nitrogen content; TP: Total phosphorus content; TK: Total potassium content; AP: Available phosphorus content; AK: Available potassium content; AN: Alkali hydrolyzed nitrogen content. Different lowercase letters indicate significant differences between treatments ( $p < 0.05$ ).

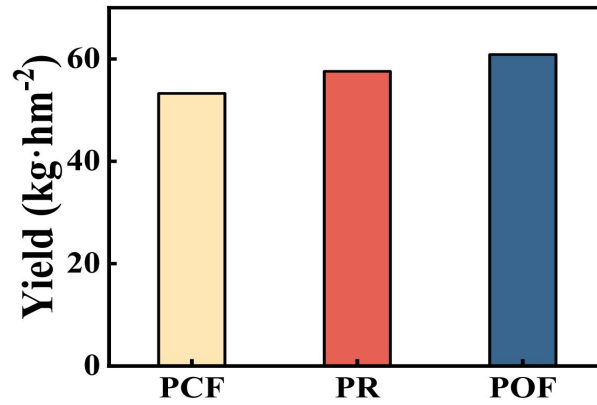

**Figure S2. Effects of low dosage organic fertilizer produced by high temperature aerobic fermentation on peanut yields.** Note: PCF: Chemical fertilizer application; PR: Organic fertilizer replace 50% chemical fertilizer; POF: Organic fertilizer application. Different lowercase letters indicate significant differences between treatments ( $p < 0.05$ ).
